# Supplementary material for: Synaptic gradients transform object location to action
Source: PubMed Central journal article supplement (PMC9849133; doi:10.1038/s41586-022-05562-8), 2023-01-04
Supplement: 41586_2022_5562_MOESM1_ESM.pdf [file 41586_2022_5562_MOESM1_ESM.pdf]

**Supplementary information**

---

**Synaptic gradients transform object location to action**

---

In the format provided by the authors and unedited

## Supplementary Information

**Supplementary Table 1:** additional information about statistical tests

**Supplementary Table 2:** list of full Drosophila genotypes used in each Figure

### Supplementary Videos

**Supplementary Video 1:** Optogenetic activation of DNp11xCsChrimson flies.

**Supplementary Video 2:** Optogenetic activation of DNp02xCsChrimson flies.

**Supplementary Video 3:** Axon terminals of single LC4 neurons with dendrites in anterior (red) and posterior (green) lobula also occupy distinct spatial domains in the LC4 optic glomerulus.

**Supplementary Video 4:** Axon terminals of single LC9 neurons with dendrites in anterior (red) and posterior (green) lobula also occupy distinct spatial domains in the LC9 optic glomerulus.

**Supplementary Video 5:** Presynaptic sites (red) of a single LC4 neuron with dendrites in the anterior lobula colocalized with the dendrites of DNp02 (blue). Significant overlap is observed. Anterior LC4 typically form >45 synapses with DNp02

**Supplementary Video 6:** Presynaptic sites (red) of a single LC4 neuron with dendrites in the posterior lobula colocalized with the dendrites of DNp02 (blue). No significant overlap is observed. Posterior LC4 typically form <5 synapses with DNp02.

## Supplementary Table 1

Figure 1e – statistical tests and p-values

| Dunnett's multiple comparisons test | Summary | P Value           |
|-------------------------------------|---------|-------------------|
| Empty vs. DNp11                     | ****    | <e-15             |
| Empty vs. DNp02                     | ****    | <e-15             |
| Empty vs. DNp02, DNp04              | ****    | <e-15             |
| Empty vs. DNp02, DNp04, DNp06       | ****    | <e-15             |
| Empty vs. DNp01                     | ns      | 0.992973895263672 |
| Empty vs. DNp04                     | ns      | 0.999808465576172 |
| Empty vs. DNp03                     | ns      | 0.999564373779297 |
| Empty vs. DNp05                     | ns      | 0.625951367187500 |
| Empty vs. DNp06                     | ns      | 0.103961059570312 |

Figures 3e, 3f – statistical tests and p-values

Fig.3e\_DNp02

| Dunnett's multiple comparisons test | Summary | P Value           |
|-------------------------------------|---------|-------------------|
| azi_32.5 vs. azi_45                 | ns      | 0.480472656250000 |
| azi_32.5 vs. azi_57.5               | ns      | 0.210202014160156 |
| azi_32.5 vs. azi_70                 | **      | 0.008429632568359 |

Fig.3e\_DNp11

| Dunnett's multiple comparisons test | Summary | P Value           |
|-------------------------------------|---------|-------------------|
| azi_32.5 vs. azi_45                 | ns      | 0.655974658203125 |
| azi_32.5 vs. azi_57.5               | ns      | 0.512326635742187 |
| azi_32.5 vs. azi_70                 | ns      | 0.361355859375000 |

Fig.3f\_DNp02

| Dunnett's multiple comparisons test | Summary | P Value           |
|-------------------------------------|---------|-------------------|
| azi_32.5 vs. azi_45                 | ns      | 0.070642529296875 |
| azi_32.5 vs. azi_57.5               | **      | 0.003612633514404 |
| azi_32.5 vs. azi_70                 | ***     | 0.000796996498108 |

Fig.3f\_DNp11

| Dunnett's multiple comparisons test | Summary | P Value           |
|-------------------------------------|---------|-------------------|
| azi_32.5 vs. azi_45                 | ns      | 0.784611035156250 |
| azi_32.5 vs. azi_57.5               | **      | 0.001566457748413 |
| azi_32.5 vs. azi_70                 | **      | 0.003273193359375 |

**Extended Data Figures 1e, 1h and 2f**

The p-value (Bonf.) indicates the application of the post-hoc Bonferroni correction for multiple comparisons. \* for  $p < 0.05$ , \*\*  $< 0.01$ , \*\*\*  $< 0.001$  and \*\*\*\*  $< 0.0001$ .

| Normal Approximation to the Binomial Z-test for Extended Data Fig. 1e |                               |                      |                      |          |          |                 |                     |
|-----------------------------------------------------------------------|-------------------------------|----------------------|----------------------|----------|----------|-----------------|---------------------|
| Group 1                                                               | Group 2                       | N <sub>Group 1</sub> | N <sub>Group 2</sub> | Z-Score  | p-value  | p-value (Bonf.) | Significance Marker |
| empty (SS01062)                                                       | DL_CTRL                       | 600                  | 771                  | 2.15E+00 | 3.18E-02 | 5.72E-01        | NS                  |
| empty (SS01062)                                                       | GF (SS00727)                  | 600                  | 292                  | 2.73E+01 | 0.00E+00 | 0.00E+00        | ****                |
| empty (SS01062)                                                       | GF (SS27721)                  | 600                  | 404                  | 2.60E+01 | 0.00E+00 | 0.00E+00        | ****                |
| empty (SS01062)                                                       | DNp02 (SS01053)               | 600                  | 327                  | 8.31E-02 | 9.34E-01 | 1.68E+01        | NS                  |
| empty (SS01062)                                                       | DNp02 (SS01554)               | 600                  | 313                  | 1.24E+00 | 2.16E-01 | 3.88E+00        | NS                  |
| empty (SS01062)                                                       | DNp03 (SS01081)               | 600                  | 325                  | 7.42E-01 | 4.58E-01 | 8.24E+00        | NS                  |
| empty (SS01062)                                                       | DNp03 (SS01596)               | 600                  | 285                  | 9.98E-01 | 3.19E-01 | 5.73E+00        | NS                  |
| empty (SS01062)                                                       | DNp04 (SS00934)               | 600                  | 276                  | 4.63E+00 | 3.57E-06 | 6.43E-05        | ****                |
| empty (SS01062)                                                       | DNp04 (SS01080)               | 600                  | 301                  | 4.24E+00 | 2.27E-05 | 4.08E-04        | ***                 |
| empty (SS01062)                                                       | DNp05 (SS02612)               | 600                  | 311                  | 4.59E-01 | 6.47E-01 | 1.16E+01        | NS                  |
| empty (SS01062)                                                       | DNp05 (SS00865)               | 600                  | 319                  | 6.63E-02 | 9.47E-01 | 1.70E+01        | NS                  |
| empty (SS01062)                                                       | DNp06 (SS02256)               | 600                  | 318                  | 1.22E+00 | 2.22E-01 | 4.00E+00        | NS                  |
| empty (SS01062)                                                       | DNp11 (SS49010)               | 600                  | 305                  | 9.90E+00 | 0.00E+00 | 0.00E+00        | ****                |
| empty (SS01062)                                                       | DNp11 (SS49024)               | 600                  | 385                  | 1.16E+01 | 0.00E+00 | 0.00E+00        | ****                |
| empty (SS01062)                                                       | DNp11 (SS49051)               | 600                  | 361                  | 3.86E+00 | 1.15E-04 | 2.06E-03        | **                  |
| empty (SS01062)                                                       | DNp02, DNp04 (SS01544)        | 600                  | 307                  | 1.38E+01 | 0.00E+00 | 0.00E+00        | ****                |
| empty (SS01062)                                                       | DNp02, DNp04, DNp06 (SS02292) | 600                  | 281                  | 1.35E+01 | 0.00E+00 | 0.00E+00        | ****                |

| Normal Approximation to the Binomial Z-test for Extended Data Fig. 1h |                     |                      |                      |          |          |                 |                     |
|-----------------------------------------------------------------------|---------------------|----------------------|----------------------|----------|----------|-----------------|---------------------|
| Group 1                                                               | Group 2             | N <sub>Group 1</sub> | N <sub>Group 2</sub> | Z-Score  | p-value  | p-value (Bonf.) | Significance Marker |
| DNp01                                                                 | DNp04               | 620                  | 70                   | 1.74E+01 | 0.00E+00 | 0.00E+00        | ****                |
| DNp01                                                                 | DNp11               | 620                  | 227                  | 2.42E+01 | 0.00E+00 | 0.00E+00        | ****                |
| DNp01                                                                 | DNp02, DNp04        | 620                  | 122                  | 1.69E+01 | 0.00E+00 | 0.00E+00        | ****                |
| DNp01                                                                 | DNp02, DNp04, DNp06 | 620                  | 111                  | 1.30E+01 | 0.00E+00 | 0.00E+00        | ****                |

| Normal Approximation to the Binomial Z-test for Extended Data Fig. 2f (I/V = 10 ms, azimuth = 90°) |                               |                      |                      |          |          |                 |                     |
|----------------------------------------------------------------------------------------------------|-------------------------------|----------------------|----------------------|----------|----------|-----------------|---------------------|
| Group 1                                                                                            | Group 2                       | N <sub>Group 1</sub> | N <sub>Group 2</sub> | Z-Score  | p-value  | p-value (Bonf.) | Significance Marker |
| empty (SS01062)                                                                                    | DL_CTRL                       | 137                  | 240                  | 1.58E+00 | 1.14E-01 | 2.40E+00        | NS                  |
| empty (SS01062)                                                                                    | L1, L2 (SS00797)              | 137                  | 172                  | 4.73E+00 | 2.25E-06 | 4.72E-05        | ****                |
| empty (SS01062)                                                                                    | GF (SS00727)                  | 137                  | 131                  | 1.28E+00 | 2.02E-01 | 4.23E+00        | NS                  |
| empty (SS01062)                                                                                    | GF (SS27721)                  | 137                  | 102                  | 1.35E+00 | 1.77E-01 | 3.73E+00        | NS                  |
| empty (SS01062)                                                                                    | DNp02 (SS01053)               | 137                  | 107                  | 1.54E+00 | 1.22E-01 | 2.57E+00        | NS                  |
| empty (SS01062)                                                                                    | DNp02 (SS01554)               | 137                  | 143                  | 7.86E-01 | 4.32E-01 | 9.07E+00        | NS                  |
| empty (SS01062)                                                                                    | DNp03 (SS01081)               | 137                  | 89                   | 1.69E+00 | 9.02E-02 | 1.89E+00        | NS                  |
| empty (SS01062)                                                                                    | DNp03 (SS01596)               | 137                  | 122                  | 8.00E-01 | 4.24E-01 | 8.90E+00        | NS                  |
| empty (SS01062)                                                                                    | DNp04 (SS00934)               | 137                  | 179                  | 3.20E-01 | 7.49E-01 | 1.57E+01        | NS                  |
| empty (SS01062)                                                                                    | DNp04 (SS01080)               | 137                  | 122                  | 1.57E+00 | 1.17E-01 | 2.46E+00        | NS                  |
| empty (SS01062)                                                                                    | DNp05 (SS02612)               | 137                  | 102                  | 2.13E-01 | 8.32E-01 | 1.75E+01        | NS                  |
| empty (SS01062)                                                                                    | DNp05 (SS00865)               | 137                  | 113                  | 8.19E-01 | 4.13E-01 | 8.66E+00        | NS                  |
| empty (SS01062)                                                                                    | DNp06 (SS02256)               | 137                  | 147                  | 2.40E+00 | 1.62E-02 | 3.40E-01        | NS                  |
| empty (SS01062)                                                                                    | DNp11 (SS49010)               | 137                  | 109                  | 1.27E-01 | 8.99E-01 | 1.89E+01        | NS                  |
| empty (SS01062)                                                                                    | DNp11 (SS49024)               | 137                  | 121                  | 4.58E-01 | 6.47E-01 | 1.36E+01        | NS                  |
| empty (SS01062)                                                                                    | DNp11 (SS49051)               | 137                  | 116                  | 1.21E-01 | 9.04E-01 | 1.90E+01        | NS                  |
| empty (SS01062)                                                                                    | DNp02, DNp04 (SS01544)        | 137                  | 130                  | 1.43E+00 | 1.54E-01 | 3.23E+00        | NS                  |
| empty (SS01062)                                                                                    | DNp02, DNp04, DNp06 (SS02292) | 137                  | 242                  | 4.37E-01 | 6.62E-01 | 1.39E+01        | NS                  |

| Normal Approximation to the Binomial Z-test for Extended Data Fig. 2f (I/V = 20 ms, azimuth = 90°) |                  |                      |                      |          |          |                 |                     |
|----------------------------------------------------------------------------------------------------|------------------|----------------------|----------------------|----------|----------|-----------------|---------------------|
| Group 1                                                                                            | Group 2          | N <sub>Group 1</sub> | N <sub>Group 2</sub> | Z-Score  | p-value  | p-value (Bonf.) | Significance Marker |
| empty (SS01062)                                                                                    | DL_CTRL          | 107                  | 263                  | 9.66E-03 | 9.92E-01 | 2.08E+01        | NS                  |
| ESC (SS01062)                                                                                      | L1, L2 (SS00797) | 107                  | 172                  | 7.09E+00 | 1.37E-12 | 2.88E-11        | ****                |
| empty (SS01062)                                                                                    | GF (SS00727)     | 107                  | 132                  | 2.05E+00 | 4.00E-02 | 8.41E-01        | NS                  |
| empty (SS01062)                                                                                    | GF (SS27721)     | 107                  | 104                  | 4.45E-01 | 6.56E-01 | 1.38E+01        | NS                  |
| empty                                                                                              | DNp02            | 107                  | 120                  | 1.73E+00 | 8.39E-02 | 1.76E+00        | NS                  |

|                    |                                  |     |     |          |          |          |    |
|--------------------|----------------------------------|-----|-----|----------|----------|----------|----|
| (SS01062)          | (SS01053)                        |     |     |          |          |          |    |
| empty<br>(SS01062) | DNp02<br>(SS01554)               | 107 | 136 | 1.29E+00 | 1.98E-01 | 4.15E+00 | NS |
| empty<br>(SS01062) | DNp03<br>(SS01081)               | 107 | 108 | 3.69E-01 | 7.12E-01 | 1.50E+01 | NS |
| empty<br>(SS01062) | DNp03<br>(SS01596)               | 107 | 115 | 8.10E-01 | 4.18E-01 | 8.78E+00 | NS |
| empty<br>(SS01062) | DNp04<br>(SS00934)               | 107 | 118 | 2.53E+00 | 1.13E-02 | 2.37E-01 | NS |
| empty<br>(SS01062) | DNp04<br>(SS01080)               | 107 | 89  | 1.24E+00 | 2.14E-01 | 4.50E+00 | NS |
| empty<br>(SS01062) | DNp05<br>(SS02612)               | 107 | 83  | 2.15E-01 | 8.30E-01 | 1.74E+01 | NS |
| empty<br>(SS01062) | DNp05<br>(SS00865)               | 107 | 110 | 7.19E-01 | 4.72E-01 | 9.91E+00 | NS |
| empty<br>(SS01062) | DNp06<br>(SS02256)               | 107 | 164 | 1.91E+00 | 5.67E-02 | 1.19E+00 | NS |
| empty<br>(SS01062) | DNp11<br>(SS49010)               | 107 | 112 | 1.50E+00 | 1.34E-01 | 2.82E+00 | NS |
| empty<br>(SS01062) | DNp11<br>(SS49024)               | 107 | 127 | 4.14E-01 | 6.79E-01 | 1.43E+01 | NS |
| empty<br>(SS01062) | DNp11<br>(SS49051)               | 107 | 115 | 8.07E-01 | 4.20E-01 | 8.81E+00 | NS |
| empty<br>(SS01062) | DNp02, DNp04<br>(SS01544)        | 107 | 129 | 2.79E+00 | 5.28E-03 | 1.11E-01 | NS |
| empty<br>(SS01062) | DNp02, DNp04,<br>DNp06 (SS02292) | 107 | 252 | 2.37E+00 | 1.79E-02 | 3.77E-01 | NS |

| Normal Approximation to the Binomial Z-test for Extended Data Fig. 2f (I/V = 40 ms, azimuth = 90°) |                     |                      |                      |          |          |                 |                     |
|----------------------------------------------------------------------------------------------------|---------------------|----------------------|----------------------|----------|----------|-----------------|---------------------|
| Group 1                                                                                            | Group 2             | N <sub>Group 1</sub> | N <sub>Group 2</sub> | Z-Score  | p-value  | p-value (Bonf.) | Significance Marker |
| empty<br>(SS01062)                                                                                 | DL_CTRL             | 150                  | 235                  | 7.96E-01 | 4.26E-01 | 8.94E+00        | NS                  |
| empty<br>(SS01062)                                                                                 | L1, L2<br>(SS00797) | 150                  | 141                  | 6.80E+00 | 1.08E-11 | 2.26E-10        | ****                |
| empty<br>(SS01062)                                                                                 | GF<br>(SS00727)     | 150                  | 119                  | 2.46E-01 | 8.06E-01 | 1.69E+01        | NS                  |
| empty<br>(SS01062)                                                                                 | GF<br>(SS27721)     | 150                  | 95                   | 8.66E-02 | 9.31E-01 | 1.96E+01        | NS                  |
| empty<br>(SS01062)                                                                                 | DNp02<br>(SS01053)  | 150                  | 95                   | 1.40E+00 | 1.61E-01 | 3.37E+00        | NS                  |
| empty<br>(SS01062)                                                                                 | DNp02<br>(SS01554)  | 150                  | 143                  | 2.24E+00 | 2.52E-02 | 5.29E-01        | NS                  |
| empty<br>(SS01062)                                                                                 | DNp03<br>(SS01081)  | 150                  | 80                   | 3.95E+00 | 7.74E-05 | 1.62E-03        | **                  |
| empty<br>(SS01062)                                                                                 | DNp03<br>(SS01596)  | 150                  | 144                  | 5.37E-01 | 5.91E-01 | 1.24E+01        | NS                  |
| empty<br>(SS01062)                                                                                 | DNp04<br>(SS00934)  | 150                  | 122                  | 1.21E+00 | 2.27E-01 | 4.78E+00        | NS                  |
| empty<br>(SS01062)                                                                                 | DNp04<br>(SS01080)  | 150                  | 98                   | 1.13E+00 | 2.57E-01 | 5.40E+00        | NS                  |
| empty                                                                                              | DNp05               | 150                  | 95                   | 1.74E+00 | 8.20E-02 | 1.72E+00        | NS                  |

|                    |                                  |     |     |          |          |          |    |
|--------------------|----------------------------------|-----|-----|----------|----------|----------|----|
| (SS01062)          | (SS02612)                        |     |     |          |          |          |    |
| empty<br>(SS01062) | DNp05<br>(SS00865)               | 150 | 108 | 4.59E-01 | 6.46E-01 | 1.36E+01 | NS |
| empty<br>(SS01062) | DNp06<br>(SS02256)               | 150 | 119 | 1.66E+00 | 9.73E-02 | 2.04E+00 | NS |
| empty<br>(SS01062) | DNp11<br>(SS49010)               | 150 | 111 | 4.91E-01 | 6.24E-01 | 1.31E+01 | NS |
| empty<br>(SS01062) | DNp11<br>(SS49024)               | 150 | 111 | 1.10E+00 | 2.70E-01 | 5.66E+00 | NS |
| empty<br>(SS01062) | DNp11<br>(SS49051)               | 150 | 123 | 2.34E+00 | 1.92E-02 | 4.02E-01 | NS |
| empty<br>(SS01062) | DNp02, DNp04<br>(SS01544)        | 150 | 70  | 7.76E-01 | 4.38E-01 | 9.19E+00 | NS |
| empty<br>(SS01062) | DNp02, DNp04,<br>DNp06 (SS02292) | 150 | 232 | 1.18E+00 | 2.38E-01 | 5.00E+00 | NS |

| Normal Approximation to the Binomial Z-test for Extended Data Fig. 2f (I/V = 80 ms, azimuth = 90°) |                     |                      |                      |          |          |                    |                        |
|----------------------------------------------------------------------------------------------------|---------------------|----------------------|----------------------|----------|----------|--------------------|------------------------|
| Group 1                                                                                            | Group 2             | N <sub>Group 1</sub> | N <sub>Group 2</sub> | Z-Score  | p-value  | p-value<br>(Bonf.) | Significance<br>Marker |
| empty<br>(SS01062)                                                                                 | DL_CTRL             | 132                  | 195                  | 2.14E+00 | 3.26E-02 | 6.84E-01           | NS                     |
| empty<br>(SS01062)                                                                                 | L1, L2<br>(SS00797) | 132                  | 130                  | 6.13E+00 | 8.52E-10 | 1.79E-08           | ****                   |
| empty<br>(SS01062)                                                                                 | GF<br>(SS00727)     | 132                  | 104                  | 7.15E-01 | 4.75E-01 | 9.97E+00           | NS                     |
| empty<br>(SS01062)                                                                                 | GF<br>(SS27721)     | 132                  | 106                  | 3.20E-01 | 7.49E-01 | 1.57E+01           | NS                     |
| empty<br>(SS01062)                                                                                 | DNp02<br>(SS01053)  | 132                  | 107                  | 6.82E-01 | 4.95E-01 | 1.04E+01           | NS                     |
| empty<br>(SS01062)                                                                                 | DNp02<br>(SS01554)  | 132                  | 108                  | 1.18E+00 | 2.38E-01 | 4.99E+00           | NS                     |
| empty<br>(SS01062)                                                                                 | DNp03<br>(SS01081)  | 132                  | 110                  | 2.59E+00 | 9.52E-03 | 2.00E-01           | NS                     |
| empty<br>(SS01062)                                                                                 | DNp03<br>(SS01596)  | 132                  | 112                  | 7.50E-01 | 4.53E-01 | 9.52E+00           | NS                     |
| empty<br>(SS01062)                                                                                 | DNp04<br>(SS00934)  | 132                  | 111                  | 9.60E-01 | 3.37E-01 | 7.07E+00           | NS                     |
| empty<br>(SS01062)                                                                                 | DNp04<br>(SS01080)  | 132                  | 111                  | 1.38E+00 | 1.67E-01 | 3.52E+00           | NS                     |
| empty<br>(SS01062)                                                                                 | DNp05<br>(SS02612)  | 132                  | 93                   | 6.86E-01 | 4.93E-01 | 1.03E+01           | NS                     |
| empty<br>(SS01062)                                                                                 | DNp05<br>(SS00865)  | 132                  | 93                   | 1.80E+00 | 7.20E-02 | 1.51E+00           | NS                     |
| empty<br>(SS01062)                                                                                 | DNp06<br>(SS02256)  | 132                  | 113                  | 1.28E-01 | 8.98E-01 | 1.89E+01           | NS                     |
| empty<br>(SS01062)                                                                                 | DNp11<br>(SS49010)  | 132                  | 102                  | 1.80E+00 | 7.19E-02 | 1.51E+00           | NS                     |
| empty<br>(SS01062)                                                                                 | DNp11<br>(SS49024)  | 132                  | 110                  | 2.02E+00 | 4.32E-02 | 9.07E-01           | NS                     |
| empty<br>(SS01062)                                                                                 | DNp11<br>(SS49051)  | 132                  | 104                  | 1.49E+00 | 1.36E-01 | 2.86E+00           | NS                     |
| empty                                                                                              | DNp02, DNp04        | 132                  | 119                  | 1.08E+00 | 2.81E-01 | 5.90E+00           | NS                     |

|                    |                                  |     |     |          |          |          |    |
|--------------------|----------------------------------|-----|-----|----------|----------|----------|----|
| (SS01062)          | (SS01544)                        |     |     |          |          |          |    |
| empty<br>(SS01062) | DNp02, DNp04,<br>DNp06 (SS02292) | 132 | 196 | 1.17E+00 | 2.41E-01 | 5.06E+00 | NS |

| Normal Approximation to the Binomial Z-test for Extended Data Fig. 2f (I/V = 40 ms, azimuth = 0°) |                    |                      |                      |          |          |                    |                        |
|---------------------------------------------------------------------------------------------------|--------------------|----------------------|----------------------|----------|----------|--------------------|------------------------|
| Group 1                                                                                           | Group 2            | N <sub>Group 1</sub> | N <sub>Group 2</sub> | Z-Score  | p-value  | p-value<br>(Bonf.) | Significance<br>Marker |
| empty<br>(SS01062)                                                                                | DNp02<br>(SS01053) | 417                  | 237                  | 3.32E+00 | 9.12E-04 | 4.56E-03           | **                     |
| empty<br>(SS01062)                                                                                | DNp02<br>(SS01554) | 417                  | 232                  | 1.88E+00 | 6.01E-02 | 3.00E-01           | NS                     |
| empty<br>(SS01062)                                                                                | DNp11<br>(SS49010) | 417                  | 197                  | 1.31E+00 | 1.91E-01 | 9.56E-01           | NS                     |
| empty<br>(SS01062)                                                                                | DNp11<br>(SS49024) | 417                  | 221                  | 7.61E-01 | 4.47E-01 | 2.23E+00           | NS                     |
| empty<br>(SS01062)                                                                                | DNp11<br>(SS49051) | 417                  | 244                  | 1.19E+00 | 2.33E-01 | 1.17E+00           | NS                     |

| Normal Approximation to the Binomial Z-test for Extended Data Fig. 2f (I/V = 40 ms, azimuth = 180°) |                    |                      |                      |          |          |                    |                        |
|-----------------------------------------------------------------------------------------------------|--------------------|----------------------|----------------------|----------|----------|--------------------|------------------------|
| Group 1                                                                                             | Group 2            | N <sub>Group 1</sub> | N <sub>Group 2</sub> | Z-Score  | p-value  | p-value<br>(Bonf.) | Significance<br>Marker |
| empty<br>(SS01062)                                                                                  | DNp02<br>(SS01053) | 459                  | 230                  | 8.93E-01 | 3.72E-01 | 1.86E+00           | NS                     |
| empty<br>(SS01062)                                                                                  | DNp02<br>(SS01554) | 459                  | 240                  | 4.22E-02 | 9.66E-01 | 4.83E+00           | NS                     |
| empty<br>(SS01062)                                                                                  | DNp11<br>(SS49010) | 459                  | 215                  | 3.45E-01 | 7.30E-01 | 3.65E+00           | NS                     |
| empty<br>(SS01062)                                                                                  | DNp11<br>(SS49024) | 459                  | 250                  | 3.89E+00 | 1.01E-04 | 5.04E-04           | ***                    |
| empty<br>(SS01062)                                                                                  | DNp11<br>(SS49051) | 459                  | 248                  | 2.26E+00 | 2.39E-02 | 1.20E-01           | NS                     |



**Extended Data Figures 4e and 4h**

Extended Data Fig. 4f - Repeated-measures one-way ANOVA, Dunnett's test

| Dunnett's multiple comparisons test | Summary | P Value           |
|-------------------------------------|---------|-------------------|
| azi_32.5 vs. azi_45                 | ns      | 0.428603149414062 |
| azi_32.5 vs. azi_57.5               | ns      | 0.111100744628906 |
| azi_32.5 vs. azi_70                 | ns      | 0.417252880859375 |

Extended Data Fig. 4h - Repeated-measures one-way ANOVA, Dunnett's test

GF

| Dunnett's multiple comparisons test | Summary | P Value           |
|-------------------------------------|---------|-------------------|
| azi_32.5 vs. azi_45                 | ns      | 0.485842675781250 |
| azi_32.5 vs. azi_57.5               | ns      | 0.564074096679688 |
| azi_32.5 vs. azi_70                 | ns      | 0.983942498779297 |

DNp04

| Dunnett's multiple comparisons test | Summary | P Value           |
|-------------------------------------|---------|-------------------|
| azi_32.5 vs. azi_45                 | ns      | 0.174991772460938 |
| azi_32.5 vs. azi_57.5               | *       | 0.027667117309570 |
| azi_32.5 vs. azi_70                 | *       | 0.015157412719727 |

**Extended Data Fig. 12 – two-tailed paired t test.**

LPLC2\_Early peak

|                                     |                   |
|-------------------------------------|-------------------|
| P value                             | 0.008024420002466 |
| P value summary                     | **                |
| Significantly different (P < 0.05)? | Yes               |
| One- or two-tailed P value?         | Two-tailed        |

LC4\_Early peak

|                                     |                   |
|-------------------------------------|-------------------|
| P value                             | 0.745984870468680 |
| P value summary                     | ns                |
| Significantly different (P < 0.05)? | No                |
| One- or two-tailed P value?         | Two-tailed        |

LC11\_Early peak

|                                     |                   |
|-------------------------------------|-------------------|
| P value                             | 0.471832705383019 |
| P value summary                     | ns                |
| Significantly different (P < 0.05)? | No                |

|                             |            |
|-----------------------------|------------|
| One- or two-tailed P value? | Two-tailed |
|-----------------------------|------------|

LPLC2\_Late peak

|                                     |                   |
|-------------------------------------|-------------------|
| P value                             | 0.000007023231523 |
| P value summary                     | ****              |
| Significantly different (P < 0.05)? | Yes               |
| One- or two-tailed P value?         | Two-tailed        |

LC4\_Late peak

|                                     |                   |
|-------------------------------------|-------------------|
| P value                             | 0.042451931129013 |
| P value summary                     | *                 |
| Significantly different (P < 0.05)? | Yes               |
| One- or two-tailed P value?         | Two-tailed        |

LC11\_Late peak

|                                     |                   |
|-------------------------------------|-------------------|
| P value                             | 0.282560538153719 |
| P value summary                     | ns                |
| Significantly different (P < 0.05)? | No                |
| One- or two-tailed P value?         | Two-tailed        |

## Supplementary Table 2

### Fly stocks and sources

| Strain                                                                                                                    | Identifier | Source                  |
|---------------------------------------------------------------------------------------------------------------------------|------------|-------------------------|
| DL wild type                                                                                                              | N/A        | M.H. Dickinson, Caltech |
| UAS-CsChrimson-mVenus (attP18)                                                                                            | N/A        | Klapoetke et al., 2014  |
| pJFRC49-UAS-eGFPKir2.1 (attP2)                                                                                            | N/A        | Von Reyn et al., 2014   |
| pJFRC28-UAS-GFP (attP2)                                                                                                   | N/A        | Pfeiffer et al., 2012   |
| Empty GAL4: R24A03-p65ADZp (attP40); R74C01-ZpGdbd (attP2)                                                                | SS01062    | Namiki et al., 2018     |
| L1, L2: R48H08_p65ADZp (attP40); R29G11_ZpGdbd (attP2)                                                                    | SS00797    | Tuthill et al., 2013    |
| GF: R14A01_p65ADZp (attP40); R79H12_ZpGdbd (attP2)                                                                        | SS00727    | Namiki et al., 2018     |
| GF: R17A04_p65ADZp (attP40); R68A06_ZpGdbd (attP2)                                                                        | SS27721    | Von Reyn et al., 2014   |
| GF: R68A06-lexA(attP40)                                                                                                   | N/A        | BDSC# 52807             |
| DNp02: VT063736_p65ADZp (attP40); R24A03_ZpGdbd (attP2)                                                                   | SS01053    | Namiki et al., 2018     |
| DNp02: VT063736_p65ADZp (attP40); VT017647_ZpGdbd (attP2)                                                                 | SS01554    | Namiki et al., 2018     |
| DNp03: R91C05_p65ADZp (attP40); R31B08_ZpGdbd (attP2)                                                                     | SS01081    | Namiki et al., 2018     |
| DNp03: R29F12_p65ADZp (attP40); R37G07_ZpGdbd (attP2)                                                                     | SS01596    | Namiki et al., 2018     |
| DNp04: VT032898_p65ADZp (attP40); VT048835_ZpGdbd (attP2)                                                                 | SS00934    | Namiki et al., 2018     |
| DNp04: R84B12_p65ADZp (attP40); VT048835_ZpGdbd (attP2)                                                                   | SS01080    | Namiki et al., 2018     |
| DNp05: VT047755_p65ADZp (attP40); VT003280_ZpGdbd (attP2)                                                                 | SS02612    | Namiki et al., 2018     |
| DNp05: VT019060_p65ADZp (attP40); VT003280_ZpGdbd (attP2)                                                                 | SS00865    | Namiki et al., 2018     |
| DNp06: VT019018_p65ADZp (attP40); VT017411_ZpGdbd (attP2)                                                                 | SS02256    | Namiki et al., 2018     |
| DNp11: BJD110D01_p65ADZp (attP40); R18G08_ZpGdbd (attP2)                                                                  | SS49010    | Namiki et al., 2018     |
| DNp11: BJD119F04_p65ADZp (attP40); R18G08_ZpGdbd (attP2)                                                                  | SS49024    | Namiki et al., 2018     |
| DNp11: R18G08_p65ADZp (attP40); BJD100H09_ZpGdbd (attP2)                                                                  | SS49051    | Namiki et al., 2018     |
| DNp11: VT025392_p65ADZp (attP40); VT057247_ZpGdbd (attP2)                                                                 | SS02891    | Namiki et al., 2018     |
| DNp02, DNp04: VT048835_p65ADZp (attP40); VT017647_ZpGdbd (attP2)                                                          | SS01544    | Namiki et al., 2018     |
| DNp02, DNp04, DNp06: VT017411_p65ADZp (attP40); VT017647_ZpGdbd (attP2)                                                   | SS02292    | Namiki et al., 2018     |
| LC4: R47H04-p65ADZp (attP40); R72E01-ZpGdbd (attP2)                                                                       | SS00315    | Wu et al. 2016          |
| LC4: R49C04-lexA(attP40)                                                                                                  | N/A        | BDSC# 53488             |
| LC9: VT027704-p65ADZp (attP40); VT040569-ZpGdbd (attP2)                                                                   | SS02645    | Wu et al. 2016          |
| LC22: R64G10-p65ADZp (attP40); R35B06-ZpGdbd (attP2)                                                                      | OL0001B    | Wu et al. 2016          |
| LPLC1: R64G09-p65ADZp (attP40); R37H04-ZpGdbd (attP2)                                                                     | OL0029B    | Wu et al. 2016          |
| LPLC2: R19G02-p65ADZp (attP40); R75G12-ZpGdbd (attP2)                                                                     | OL0048B    | Wu et al. 2016          |
| LPLC2: R75G12-lexA(attP40)                                                                                                | N/A        | BDSC# 54073             |
| MCFO: hs-FLPG5.PEST;; 10xUAS(FRT.stop)myr::smGdP-V5-THS<br>10xUAS(FRT.stop)myr::smGdP-FLAG, 10xUAS(FRT.stop)myr::smGdP-HA | N/A        | BDSC# 64085             |
| UAS-P2X2, UAS-GFP                                                                                                         | N/A        | von Reyn et al., 2014   |
| Sparse StaR: LexAop-(FRT.stop)-myr::GFP-2A-R, brp-(RSRT.stop)-myr::smGdP-V5-2A-LexA                                       | N/A        | this paper              |
| Sparse StaR: LexAop-(FRT.stop)-myr::tdTomato-2A-R, brp-(RSRT.stop)-myr::smGdP-V5-2A-LeA                                   | N/A        | this paper              |
| 10xUAS-IVS-myr::smGdP-HA(attP18)                                                                                          | N/A        | BDSC# 62145             |
| 10xUAS-IVS-myr::smGdP-HA(attP18), 13xLexAop2-IVS-myr::smGdP-V5(attP8)                                                     | N/A        | BDSC# 76358             |
| LC11: R22H02-p65ADZp (attP40); R20G06-ZpGdbd (attP2)                                                                      | OL0015B    | Wu et al. 2016          |

### Genotypes by figure

| Stock/genotype                                                                     | Cells/effector                  | Used in figure           |
|------------------------------------------------------------------------------------|---------------------------------|--------------------------|
| 20XUAS-CsChrimson-mVenus/w <sup>+</sup> ; +/+; +/+                                 | DL wild type<br>> CsChrimson    | Ext Fig. 1               |
| 20XUAS-CsChrimson-mVenus/w <sup>+</sup> ; R24A03_p65ADZp/+;<br>R74C01_ZpGdbd/+     | Empty (SS01062)<br>> CsChrimson | Fig. 1e-i,<br>Ext Fig. 1 |
| 20XUAS-CsChrimson-mVenus/w <sup>+</sup> ; R14A01_p65ADZp/+;<br>R79H12_ZpGdbd/+     | GF (SS00727)<br>> CsChrimson    | Fig. 1e-i,<br>Ext Fig. 1 |
| 20XUAS-CsChrimson-mVenus/w <sup>+</sup> ; R17A04_p65ADZp/+;<br>R68A06_ZpGdbd/+     | GF (SS27721)<br>> CsChrimson    | Fig. 1e-i,<br>Ext Fig. 1 |
| 20XUAS-CsChrimson-mVenus/w <sup>+</sup> ; VT063736_p65ADZp/+;<br>R24A03_ZpGdbd/+   | DNp02 (SS01053)<br>> CsChrimson | Fig. 1e-i,<br>Ext Fig. 1 |
| 20XUAS-CsChrimson-mVenus/w <sup>+</sup> ; VT063736_p65ADZp/+;<br>VT017647_ZpGdbd/+ | DNp02 (SS01554)<br>> CsChrimson | Fig. 1e-i,<br>Ext Fig. 1 |

|                                                                                    |                                 |                          |
|------------------------------------------------------------------------------------|---------------------------------|--------------------------|
| 20XUAS-CsChrimson-mVenus/w <sup>+</sup> ; R91C05_p65ADZp/+;<br>R31B08_ZpGdbd/+     | DNp03 (SS01081)<br>> CsChrimson | Ext Fig. 1               |
| 20XUAS-CsChrimson-mVenus/w <sup>+</sup> ; R29F12_p65ADZp/+;<br>R37G07_ZpGdbd/+     | DNp03 (SS01596)<br>> CsChrimson | Ext Fig. 1               |
| 20XUAS-CsChrimson-mVenus/w <sup>+</sup> ; VT032898_p65ADZp/+;<br>VT048835_ZpGdbd/+ | DNp04 (SS00934)<br>> CsChrimson | Fig. 1e-i,<br>Ext Fig. 1 |
| 20XUAS-CsChrimson-mVenus/w <sup>+</sup> ; R84B12_p65ADZp/+;<br>VT048835_ZpGdbd/+   | DNp04 (SS01080)<br>> CsChrimson | Fig. 1e-i,<br>Ext Fig. 1 |
| 20XUAS-CsChrimson-mVenus/w <sup>+</sup> ; VT047755_p65ADZp/+;<br>VT003280_ZpGdbd/+ | DNp05 (SS02612)<br>> CsChrimson | Ext Fig. 1               |

|                                                                                         |                                                  |                          |
|-----------------------------------------------------------------------------------------|--------------------------------------------------|--------------------------|
| 20XUAS-CsChrimson-mVenus/w <sup>+</sup> ; VT019060_p65ADZp/+;<br>VT003280_ZpGdbd/+      | DNp05 (SS00865)<br>> CsChrimson                  | Ext Fig. 1               |
| 20XUAS-CsChrimson-mVenus/w <sup>+</sup> ; VT019018_p65ADZp/+;<br>VT017411_ZpGdbd/+      | DNp06 (SS02256)<br>> CsChrimson                  | Ext Fig. 1               |
| 20XUAS-CsChrimson-mVenus/w <sup>+</sup> ; BJD110D01_p65ADZp/+;<br>R18G08_ZpGdbd/+       | DNp11 (SS49010)<br>> CsChrimson                  | Fig. 1e-i,<br>Ext Fig. 1 |
| 20XUAS-CsChrimson-mVenus/w <sup>+</sup> ; BJD119F04_p65ADZp/+;<br>R18G08_ZpGdbd/+       | DNp11 (SS49024)<br>> CsChrimson                  | Fig. 1e-i,<br>Ext Fig. 1 |
| 20XUAS-CsChrimson-mVenus/w <sup>+</sup> ; R18G08_p65ADZp/+;<br>BJD100H09_ZpGdbd/+       | DNp11 (SS49051)<br>> CsChrimson                  | Fig. 1e-i,<br>Ext Fig. 1 |
| 20XUAS-CsChrimson-mVenus/w <sup>+</sup> ; VT048835_p65ADZp/+;<br>VT017647_ZpGdbd/+      | DNp02, DNp04<br>(SS01544)<br>> CsChrimson        | Fig. 1e-i,<br>Ext Fig. 1 |
| 20XUAS-CsChrimson-mVenus/w <sup>+</sup> ; VT017411_p65ADZp/+;<br>VT017647_ZpGdbd/+      | DNp02, DNp04,<br>DNp06 (SS02292)<br>> CsChrimson | Ext Fig. 1               |
| w <sup>+</sup> ; +/-; pJFRC49-10XUAS-IVS-eGFPKir2.1/+                                   | DL wild type<br>> Kir2.1                         | Ext Fig. 2               |
| w <sup>+</sup> ; R24A03_p65ADZp/+; R74C01_ZpGdbd/ pJFRC49-10XUAS-IVS-<br>eGFPKir2.1     | ESC (SS01062)<br>> Kir2.1                        | Ext Fig. 2               |
| w <sup>+</sup> ; R48H08_p65ADZp/+; R29G11_ZpGdbd/ pJFRC49-10XUAS-IVS-<br>eGFPKir2.1     | L1, L2 (SS00797)<br>> Kir2.1                     | Ext Fig. 2               |
| w <sup>+</sup> ; R14A01_p65ADZp/+; R79H12_ZpGdbd/ pJFRC49-10XUAS-IVS-<br>eGFPKir2.1     | DNp01 (SS00727)<br>> Kir2.1                      | Ext Fig. 2               |
| w <sup>+</sup> ; R17A04_p65ADZp/+; R68A06_ZpGdbd/ pJFRC49-10XUAS-IVS-<br>eGFPKir2.1     | DNp01 (SS27721)<br>> Kir2.1                      | Ext Fig. 2               |
| w <sup>+</sup> ; VT063736_p65ADZp/+; R24A03_ZpGdbd/ pJFRC49-10XUAS-IVS-<br>eGFPKir2.1   | DNp02 (SS01053)<br>> Kir2.1                      | Ext Fig. 2               |
| w <sup>+</sup> ; VT063736_p65ADZp/+; VT017647_ZpGdbd/ pJFRC49-10XUAS-IVS-<br>eGFPKir2.1 | DNp02 (SS01554)<br>> Kir2.1                      | Ext Fig. 2               |
| w <sup>+</sup> ; R91C05_p65ADZp/+; R31B08_ZpGdbd/ pJFRC49-10XUAS-IVS-<br>eGFPKir2.1     | DNp03 (SS01081)<br>> Kir2.1                      | Ext Fig. 2               |
| w <sup>+</sup> ; R29F12_p65ADZp/+; R37G07_ZpGdbd/ pJFRC49-10XUAS-IVS-<br>eGFPKir2.1     | DNp03 (SS01596)<br>> Kir2.1                      | Ext Fig. 2               |
| w <sup>+</sup> ; VT032898_p65ADZp/+; VT048835_ZpGdbd/ pJFRC49-10XUAS-IVS-<br>eGFPKir2.1 | DNp04 (SS00934)<br>> Kir2.1                      | Ext Fig. 2               |
| w <sup>+</sup> ; R84B12_p65ADZp/+; VT048835_ZpGdbd/ pJFRC49-10XUAS-IVS-<br>eGFPKir2.1   | DNp04 (SS01080)<br>> Kir2.1                      | Ext Fig. 2               |
| w <sup>+</sup> ; VT047755_p65ADZp/+; VT003280_ZpGdbd/ pJFRC49-10XUAS-IVS-<br>eGFPKir2.1 | DNp05 (SS02612)<br>> Kir2.1                      | Ext Fig. 2               |
| w <sup>+</sup> ; VT019060_p65ADZp/+; VT003280_ZpGdbd/ pJFRC49-10XUAS-IVS-<br>eGFPKir2.1 | DNp05 (SS00865)<br>> Kir2.1                      | Ext Fig. 2               |
| w <sup>+</sup> ; VT019018_p65ADZp/+; VT017411_ZpGdbd/ pJFRC49-10XUAS-IVS-<br>eGFPKir2.1 | DNp06 (SS02256)<br>> Kir2.1                      | Ext Fig. 2               |
| w <sup>+</sup> ; BJD110D01_p65ADZp/+; R18G08_ZpGdbd/ pJFRC49-10XUAS-IVS-<br>eGFPKir2.1  | DNp11 (SS49010)<br>> Kir2.1                      | Ext Fig. 2               |
| w <sup>+</sup> ; BJD119F04_p65ADZp/+; R18G08_ZpGdbd/ pJFRC49-10XUAS-IVS-<br>eGFPKir2.1  | DNp11 (SS49024)<br>> Kir2.1                      | Ext Fig. 2               |
| w <sup>+</sup> ; R18G08_p65ADZp/+; BJD100H09_ZpGdbd/ pJFRC49-10XUAS-IVS-<br>eGFPKir2.1  | DNp11 (SS49051)<br>> Kir2.1                      | Ext Fig. 2               |
| w <sup>+</sup> ; VT048835_p65ADZp/+; VT017647_ZpGdbd/ pJFRC49-10XUAS-IVS-<br>eGFPKir2.1 | DNp02, DNp04<br>(SS01544)<br>> Kir2.1            | Ext Fig. 2               |

|                                                                                                                                                                     |                                        |                                         |
|---------------------------------------------------------------------------------------------------------------------------------------------------------------------|----------------------------------------|-----------------------------------------|
| w <sup>*</sup> ; VT017411_p65ADZp/+; VT017647_ZpGdbd/ pJFRC49-10XUAS-IVS-eGFPKir2.1                                                                                 | DNp02, DNp04, DNp06 (SS02292) > Kir2.1 | Ext Fig. 2                              |
| w <sup>*</sup> ; VT063736_p65ADZp/+; R24A03_ZpGdbd/ pJFRC28-10XUAS-IVS-GFP-p10                                                                                      | DNp02 (SS01053) > GFP                  | Fig. 3a-f, Ext Fig. 4c, 4i-j            |
| w <sup>*</sup> ; R18G08_p65ADZp/+; BJD100H09_ZpGdbd/ pJFRC28-10XUAS-IVS-GFP-p10                                                                                     | DNp11 (SS49051) > GFP                  | Fig. 3a-f, Ext Fig. 4c, 4i-j            |
| w <sup>*</sup> ; R17A04_p65ADZp/+; R68A06_ZpGdbd/ pJFRC28-10XUAS-IVS-GFP-p10                                                                                        | GF (SS27721) > GFP                     | Ext Fig. 4b-j                           |
| w <sup>*</sup> ; VT032898_p65ADZp/+; VT048835_ZpGdbd/ pJFRC28-10XUAS-IVS-GFP-p10                                                                                    | DNp04 (SS00934) > GFP                  | Ext Fig. 4b-j                           |
| w <sup>*</sup> , hs-FLPG5.PEST; R47H03- p65ADZp/+; R72E01-ZpGdbd /10xUAS(FRT.stop)myr::smGdP-V5-THS 10xUAS(FRT.stop)myr::smGdP-FLAG), 10xUAS(FRT.stop)myr::smGdP-HA | LC4>MCFO                               | Fig. 5a, Ext Fig. 8a, S. Video 3        |
| hs-FLPG5.PEST; VT027704-p65ADZp/+; VT040569-ZpGdbd /10xUAS(FRT.stop)myr::smGdP-V5-THS 10xUAS(FRT.stop)myr::smGdP-FLAG), 10xUAS(FRT.stop)myr::smGdP-HA               | LC9>MCFO                               | Ext Fig. 8b, S. Video 4                 |
| hs-FLPG5.PEST; R64G10-p65ADZp/+; R35B06-ZpGdbd /10xUAS(FRT.stop)myr::smGdP-V5-THS 10xUAS(FRT.stop)myr::smGdP-FLAG), 10xUAS(FRT.stop)myr::smGdP-HA                   | LC22>MCFO                              | Ext Fig. 8c, Ext Fig. 8f                |
| hs-FLPG5.PEST; R19G02-p65ADZp /+; R75G12-ZpGdbd /10xUAS(FRT.stop)myr::smGdP-V5-THS 10xUAS(FRT.stop)myr::smGdP-FLAG), 10xUAS(FRT.stop)myr::smGdP-HA                  | LPLC2>MCFO                             | Fig. 5b, Ext Fig. 8f                    |
| hs-FLPG5.PEST; R64G09- p65ADZp/+; R37H04-ZpGdbd /10xUAS(FRT.stop)myr::smGdP-V5-THS 10xUAS(FRT.stop)myr::smGdP-FLAG), 10xUAS(FRT.stop)myr::smGdP-HA                  | LPLC1>MCFO                             | Ext. Fig. 8d                            |
| w <sup>*</sup> , UAS-myr::smGdP-HA, LexAop-myr::smGdP-V5; R49C04-LexA/VT063736-p65ADZp; GMR24A03-ZpGdbd /+                                                          | LC4>DNp02                              | Fig. 6c, Ext Fig.10a-b                  |
| w <sup>*</sup> , UAS-myr::smGdP-HA, LexAop-myr::smGdP-V5; R49C04-LexA/VT025392-p65ADZp; VT057247-ZpGdbd /+                                                          | LC4>DNp11                              | Fig. 6c, Ext Fig.10a-b                  |
| w <sup>*</sup> , UAS-myr::smGdP-HA, LexAop-myr::smGdP-V5; R49C04-LexA/VT032898-p65ADZp; VT048835-ZpGdbd /+                                                          | LC4>DNp04                              | Fig. 6c, Ext Fig.10a-b                  |
| w <sup>*</sup> , hs-FLPG5.PEST/UAS-myr::smGdP-HA; R49C04-LexA/VT063736-p65ADZp; LexAop-(FRT.stop)myr::GFP-2A-R, Brp-(RSRT.stop)myr::smGdP-V5/R24A03-ZpGdbd          | LC4 sparse STaR > DNp02                | Fig. 6e, 6g, Ext Fig. 10e, S. Video 5,6 |
| w <sup>*</sup> , hs-FLPG5.PEST/UAS-myr::smGdP-HA; R49C04-LexA/VT025392-p65ADZp; LexAop-(FRT.stop)myr::GFP-2A-R, Brp-(RSRT.stop)myr::smGdP-V5/VT057247-ZpGdbd        | LC4 sparse STaR > DNp11                | Fig. 6f, 6h                             |
| w <sup>*</sup> , hs-FLPG5.PEST/UAS-myr::smGdP-HA; R75G12-LexA/R17A05-p65ADZp; LexAop-(FRT.stop)myr::GFP-2A-R, Brp-(RSRT.stop)myr::smGdP-V5/GMR68A06-ZpGdbd          | LPLC2 sparse STaR > Giant Fiber        | Fig. 6k, Ext Fig. 10f                   |
| w <sup>*</sup> ; R68A06-LexA, LexAop-GFP/R19G02-p65ADZp; R75G12- ZpGdbd /UAS-P2X2, UAS-GFP                                                                          | LPLC2>P2X2, GF-GFP                     | Fig 6m, Ext Fig. 12a-c                  |
| w <sup>*</sup> ; R68A06-LexA, LexAop-GFP/R47H03-p65ADZp; R72E01- ZpGdbd /UAS-P2X2, UAS-GFP                                                                          | LC4>P2X2, GF-GFP                       | Fig 6m, Ext Fig. 12a-c                  |
| w <sup>*</sup> ; R68A06-LexA, LexAop-GFP/R22H02-p65ADZp; R20G06- ZpGdbd /UAS-P2X2, UAS-GFP                                                                          | LC11>P2X2, GF-GFP                      | Ext Fig. 12a-c                          |
